# Supplementary material for: A Path Model for Subjective Well-Being during the Second Wave of the COVID-19 Pandemic: A Comparative Study among Polish and Ukrainian University Students
Source: MDPI journal article supplement (doi:10.3390/jcm11164726), 2022-08-12
Supplement: s1 [file s1]

## Supplementary material

**Table S1.** Parameters estimates for path model in the total sample ( $N = 3230$ )

| Variables         |                  | <i>B</i> | <i>SE</i> | 95% CI |       | $\beta$ | <i>z</i> | <i>p</i> |
|-------------------|------------------|----------|-----------|--------|-------|---------|----------|----------|
| Dependent         | Predictor        |          |           | Lower  | Upper |         |          |          |
| Life satisfaction | Physical health  | −0.98    | 0.11      | −1.20  | −0.76 | −0.14   | −8.77    | < 0.001  |
| Life satisfaction | Anxiety          | 0.25     | 0.03      | 0.19   | 0.31  | 0.22    | 7.95     | < 0.001  |
| Life satisfaction | Depression       | −0.25    | 0.03      | −0.30  | −0.19 | −0.26   | −9.34    | < 0.001  |
| Life satisfaction | Relationships    | −1.28    | 0.18      | −1.63  | −0.94 | −0.11   | −7.19    | < 0.001  |
| Life satisfaction | Religiosity      | 0.51     | 0.10      | 0.32   | 0.72  | 0.08    | 5.04     | < 0.001  |
| Life satisfaction | Positive effects | 0.20     | 0.02      | 0.17   | 0.23  | 0.20    | 12.20    | < 0.001  |
| Life satisfaction | Gender           | 1.24     | 0.19      | 0.89   | 1.59  | 0.10    | 6.65     | < 0.001  |
| Life satisfaction | Stress           | −0.30    | 0.02      | −0.33  | −0.27 | −0.37   | −18.03   | < 0.001  |
| Life satisfaction | Age              | 0.02     | 0.03      | −0.03  | 0.07  | 0.01    | 0.69     | 0.488    |
| Physical health   | PA               | −0.17    | 0.03      | −0.23  | −0.11 | −0.09   | −5.82    | < 0.001  |
| Physical health   | Stress           | 0.03     | 0.00      | 0.02   | 0.03  | 0.21    | 9.71     | < 0.001  |
| Physical health   | Age              | 0.03     | 0.00      | 0.02   | 0.04  | 0.11    | 7.08     | < 0.001  |
| Physical health   | Anxiety          | 0.03     | 0.00      | 0.03   | 0.04  | 0.20    | 8.80     | < 0.001  |
| PTSD              | Physical health  | 0.89     | 0.19      | 0.48   | 1.24  | 0.06    | 4.63     | < 0.001  |
| PTSD              | Stress           | 0.39     | 0.03      | 0.34   | 0.45  | 0.23    | 13.87    | < 0.001  |
| PTSD              | Anxiety          | 1.31     | 0.05      | 1.20   | 1.40  | 0.55    | 27.14    | < 0.001  |
| Anxiety           | Stress           | 0.50     | 0.01      | 0.48   | 0.52  | 0.70    | 54.85    | < 0.001  |
| Depression        | Anxiety          | 0.60     | 0.02      | 0.55   | 0.64  | 0.51    | 24.28    | < 0.001  |
| Depression        | Religiosity      | −0.57    | 0.07      | −0.70  | −0.44 | −0.08   | −8.72    | < 0.001  |
| Depression        | Stress           | 0.08     | 0.01      | 0.06   | 0.10  | 0.10    | 6.32     | < 0.001  |
| Depression        | Age              | −0.04    | 0.01      | −0.07  | −0.01 | −0.02   | −2.82    | 0.005    |
| Depression        | Physical health  | 0.52     | 0.08      | 0.39   | 0.68  | 0.07    | 6.88     | < 0.001  |
| Depression        | Relationships    | 0.87     | 0.12      | 0.64   | 1.11  | 0.07    | 7.20     | < 0.001  |
| Depression        | PTSD             | 0.14     | 0.01      | 0.12   | 0.16  | 0.28    | 15.24    | < 0.001  |

*Note.* PTSD = posttraumatic stress disorder related to the COVID-19 pandemic, *CI* = confidence interval.

**Table S2.** Parameters estimates for path model in the Polish sample ( $n = 1581$ )

| Variables         |                  | <i>B</i> | <i>SE</i> | 95% CI |       | $\beta$ | <i>z</i> | <i>p</i> |
|-------------------|------------------|----------|-----------|--------|-------|---------|----------|----------|
| Dependent         | Predictor        |          |           | Lower  | Upper |         |          |          |
| Life satisfaction | Physical health  | −0.95    | 0.11      | −1.14  | −0.71 | −0.13   | −8.72    | <0.001   |
| Life satisfaction | Anxiety          | 0.24     | 0.03      | 0.18   | 0.30  | 0.22    | 7.77     | <0.001   |
| Life satisfaction | Depression       | −0.24    | 0.03      | −0.30  | −0.20 | −0.26   | −9.37    | <0.001   |
| Life satisfaction | Relationships    | −1.35    | 0.18      | −1.71  | −1.01 | −0.11   | −7.63    | <0.001   |
| Life satisfaction | Religiosity      | −0.56    | 0.10      | 0.35   | 0.76  | 0.09    | 5.45     | <0.001   |
| Life satisfaction | Positive effects | 0.18     | 0.02      | 0.15   | 0.21  | 0.18    | 11.26    | <0.001   |
| Life satisfaction | Gender           | 1.11     | 0.18      | 0.75   | 1.48  | 0.09    | 6.23     | <0.001   |
| Life satisfaction | Stress           | −0.29    | 0.02      | −0.33  | −0.26 | −0.36   | −17.19   | <0.001   |
| Life satisfaction | Age              | 0.08     | 0.03      | 0.02   | 0.13  | 0.05    | 2.73     | 0.006    |
| Physical health   | PA               | −0.18    | 0.03      | −0.24  | −0.12 | −0.11   | −5.98    | <0.001   |
| Physical health   | Stress           | 0.02     | 0.00      | 0.02   | 0.03  | 0.22    | 9.02     | <0.001   |
| Physical health   | Age              | 0.02     | 0.00      | 0.01   | 0.03  | 0.09    | 4.82     | <0.001   |
| Physical health   | Anxiety          | 0.03     | 0.00      | 0.03   | 0.04  | 0.22    | 8.71     | <0.001   |
| PTSD              | Physical health  | 0.76     | 0.19      | 0.39   | 1.15  | 0.05    | 3.93     | <0.001   |
| PTSD              | Stress           | 0.38     | 0.03      | 0.32   | 0.44  | 0.23    | 13.03    | <0.001   |
| PTSD              | Anxiety          | 1.33     | 0.05      | 1.22   | 1.41  | 0.58    | 27.67    | <0.001   |
| Anxiety           | Stress           | 0.50     | 0.01      | 0.48   | 0.52  | 0.69    | 56.90    | <0.001   |
| Depression        | Anxiety          | 0.60     | 0.02      | 0.55   | 0.64  | 0.51    | 25.51    | <0.001   |
| Depression        | Religiosity      | −0.58    | 0.07      | −0.71  | −0.45 | −0.09   | −8.78    | <0.001   |
| Depression        | Stress           | 0.08     | 0.01      | 0.06   | 0.11  | 0.10    | 6.32     | <0.001   |
| Depression        | Age              | −0.05    | 0.02      | −0.08  | −0.02 | −0.03   | −3.18    | 0.001    |
| Depression        | Physical health  | 0.52     | 0.07      | 0.38   | 0.66  | 0.07    | 7.30     | <0.001   |
| Depression        | Relationships    | 0.88     | 0.11      | 0.66   | 1.10  | 0.07    | 7.88     | <0.001   |
| Depression        | PTSD             | 0.14     | 0.01      | 0.12   | 0.15  | 0.27    | 15.24    | <0.001   |

*Note.* PTSD = posttraumatic stress disorder related to the COVID-19 pandemic, *CI* = confidence interval.

**Table S3.** Parameters estimates for path model in the Ukrainian sample ( $n = 1649$ )

| Variables         |                  | <i>B</i> | <i>SE</i> | 95% CI |       | $\beta$ | <i>z</i> | <i>p</i> |
|-------------------|------------------|----------|-----------|--------|-------|---------|----------|----------|
| Dependent         | Predictor        |          |           | Lower  | Upper |         |          |          |
| Life satisfaction | Physical health  | −0.95    | 0.11      | −1.14  | −0.71 | −0.15   | −8.72    | <0.001   |
| Life satisfaction | Anxiety          | 0.24     | 0.03      | 0.18   | 0.30  | 0.21    | 7.77     | <0.001   |
| Life satisfaction | Depression       | −0.24    | 0.03      | −0.30  | −0.20 | −0.25   | −9.37    | <0.001   |
| Life satisfaction | Relationships    | −1.35    | 0.18      | −1.71  | −1.01 | −0.11   | −7.63    | <0.001   |
| Life satisfaction | Religiosity      | 0.56     | 0.10      | 0.35   | 0.76  | 0.08    | 5.45     | <0.001   |
| Life satisfaction | Positive effects | 0.18     | 0.02      | 0.15   | 0.21  | 0.19    | 11.26    | <0.001   |
| Life satisfaction | Gender           | 1.11     | 0.18      | 0.75   | 1.48  | 0.09    | 6.23     | <0.001   |
| Life satisfaction | Stress           | −0.29    | 0.02      | −0.33  | −0.26 | −0.35   | −17.19   | <0.001   |
| Life satisfaction | Age              | 0.08     | 0.03      | 0.02   | 0.13  | 0.03    | 2.73     | 0.006    |
| Physical health   | PA               | −0.18    | 0.03      | −0.24  | −0.12 | −0.09   | −5.98    | <0.001   |
| Physical health   | Stress           | 0.02     | 0.00      | 0.02   | 0.03  | 0.19    | 9.02     | <0.001   |
| Physical health   | Age              | 0.02     | 0.00      | 0.01   | 0.03  | 0.05    | 4.82     | <0.001   |
| Physical health   | Anxiety          | 0.03     | 0.00      | 0.03   | 0.04  | 0.18    | 8.71     | <0.001   |
| PTSD              | Physical health  | 0.76     | 0.19      | 0.39   | 1.15  | 0.06    | 3.93     | <0.001   |
| PTSD              | Stress           | 0.38     | 0.03      | 0.32   | 0.44  | 0.22    | 13.03    | <0.001   |
| PTSD              | Anxiety          | 1.33     | 0.05      | 1.22   | 1.41  | 0.55    | 27.67    | <0.001   |
| Anxiety           | Stress           | 0.50     | 0.01      | 0.48   | 0.52  | 0.71    | 56.90    | <0.001   |
| Depression        | Anxiety          | 0.60     | 0.02      | 0.55   | 0.64  | 0.50    | 25.51    | <0.001   |
| Depression        | Religiosity      | −0.58    | 0.07      | −0.71  | −0.45 | −0.08   | −8.78    | <0.001   |
| Depression        | Stress           | 0.08     | 0.01      | 0.06   | 0.11  | 0.10    | 6.32     | <0.001   |
| Depression        | Age              | −0.05    | 0.02      | −0.08  | −0.02 | −0.02   | −3.18    | 0.001    |
| Depression        | Physical health  | 0.52     | 0.07      | 0.38   | 0.66  | 0.08    | 7.30     | <0.001   |
| Depression        | Relationships    | 0.88     | 0.11      | 0.66   | 1.10  | 0.07    | 7.88     | <0.001   |
| Depression        | PTSD             | 0.14     | 0.01      | 0.12   | 0.15  | 0.28    | 15.24    | <0.001   |

*Note.* PTSD = posttraumatic stress disorder related to the COVID-19 pandemic, *CI* = confidence interval.

**Table S4.** Estimation of path parameters for life satisfaction in Polish sample of university students ( $n = 1581$ )

| Path parameter                                                                                             | <i>B</i> | <i>SE</i> | 95% CI |       | $\beta$ | <i>z</i> | <i>p</i> |
|------------------------------------------------------------------------------------------------------------|----------|-----------|--------|-------|---------|----------|----------|
|                                                                                                            |          |           | Lower  | Upper |         |          |          |
| PH $\Rightarrow$ PTSD $\Rightarrow$ Depression $\Rightarrow$ LS                                            | -0.03    | 0.01      | -0.04  | -0.01 | 0.00    | -3.55    | <0.001   |
| PH $\Rightarrow$ Depression $\Rightarrow$ LS                                                               | -0.13    | 0.02      | -0.17  | -0.09 | -0.02   | -5.95    | <0.001   |
| Anxiety $\Rightarrow$ PH $\Rightarrow$ LS                                                                  | -0.03    | 0.01      | -0.04  | -0.02 | -0.03   | -6.39    | <0.001   |
| Anxiety $\Rightarrow$ PH $\Rightarrow$ PTSD $\Rightarrow$ Depression $\Rightarrow$ LS                      | 0.00     | 0.00      | 0.00   | 0.00  | 0.00    | -3.25    | 0.001    |
| Anxiety $\Rightarrow$ PH $\Rightarrow$ Depression $\Rightarrow$ LS                                         | 0.00     | 0.00      | -0.01  | 0.00  | 0.00    | -4.89    | <0.001   |
| Anxiety $\Rightarrow$ PTSD $\Rightarrow$ Depression $\Rightarrow$ LS                                       | -0.05    | 0.01      | -0.06  | -0.04 | -0.04   | -7.74    | <0.001   |
| Anxiety $\Rightarrow$ Depression $\Rightarrow$ LS                                                          | -0.15    | 0.02      | -0.18  | -0.11 | -0.13   | -8.60    | <0.001   |
| RelStat1 $\Rightarrow$ Depression $\Rightarrow$ LS                                                         | -0.21    | 0.04      | -0.29  | -0.15 | -0.02   | -5.98    | <0.001   |
| Religiosity $\Rightarrow$ Depression $\Rightarrow$ LS                                                      | 0.14     | 0.02      | 0.10   | 0.19  | 0.02    | 6.29     | <0.001   |
| Stress $\Rightarrow$ PH $\Rightarrow$ LS                                                                   | -0.02    | 0.00      | -0.03  | -0.02 | -0.03   | -6.05    | <0.001   |
| Stress $\Rightarrow$ PH $\Rightarrow$ PTSD $\Rightarrow$ Depression $\Rightarrow$ LS                       | 0.00     | 0.00      | 0.00   | 0.00  | 0.00    | -3.31    | <0.001   |
| Stress $\Rightarrow$ PH $\Rightarrow$ Depression $\Rightarrow$ LS                                          | 0.00     | 0.00      | 0.00   | 0.00  | 0.00    | -4.98    | <0.001   |
| Stress $\Rightarrow$ PTSD $\Rightarrow$ Depression $\Rightarrow$ LS                                        | -0.01    | 0.00      | -0.02  | -0.01 | -0.02   | -7.32    | <0.001   |
| Stress $\Rightarrow$ Anxiety $\Rightarrow$ LS                                                              | 0.12     | 0.02      | 0.09   | 0.15  | 0.15    | 7.69     | <0.001   |
| Stress $\Rightarrow$ Anxiety $\Rightarrow$ PH $\Rightarrow$ LS                                             | -0.02    | 0.00      | -0.02  | -0.01 | -0.02   | -6.42    | <0.001   |
| Stress $\Rightarrow$ Anxiety $\Rightarrow$ PH $\Rightarrow$ PTSD $\Rightarrow$ Depression $\Rightarrow$ LS | 0.00     | 0.00      | 0.00   | 0.00  | 0.00    | -3.26    | 0.001    |
| Stress $\Rightarrow$ Anxiety $\Rightarrow$ PH $\Rightarrow$ Depression $\Rightarrow$ LS                    | 0.00     | 0.00      | 0.00   | 0.00  | 0.00    | -4.89    | <0.001   |
| Stress $\Rightarrow$ Anxiety $\Rightarrow$ PTSD $\Rightarrow$ Depression $\Rightarrow$ LS                  | -0.02    | 0.00      | -0.03  | -0.02 | -0.03   | -7.69    | <0.001   |
| Stress $\Rightarrow$ Anxiety $\Rightarrow$ Depression $\Rightarrow$ LS                                     | -0.07    | 0.01      | -0.09  | -0.06 | -0.09   | -8.49    | <0.001   |
| Stress $\Rightarrow$ Depression $\Rightarrow$ LS                                                           | -0.02    | 0.00      | -0.03  | -0.01 | -0.03   | -5.28    | <0.001   |
| Age $\Rightarrow$ PH $\Rightarrow$ LS                                                                      | -0.02    | 0.00      | -0.03  | -0.01 | -0.01   | -4.17    | <0.001   |
| Age $\Rightarrow$ PH $\Rightarrow$ PTSD $\Rightarrow$ Depression $\Rightarrow$ LS                          | 0.00     | 0.00      | 0.00   | 0.00  | 0.00    | -2.75    | 0.006    |
| Age $\Rightarrow$ PH $\Rightarrow$ Depression $\Rightarrow$ LS                                             | 0.00     | 0.00      | 0.00   | 0.00  | 0.00    | -3.69    | <0.001   |
| Age $\Rightarrow$ Depression $\Rightarrow$ LS                                                              | 0.01     | 0.00      | 0.01   | 0.02  | 0.01    | 2.97     | 0.003    |
| PA $\Rightarrow$ PH $\Rightarrow$ LS                                                                       | 0.17     | 0.04      | 0.11   | 0.26  | 0.01    | 4.64     | <0.001   |
| PA $\Rightarrow$ PH $\Rightarrow$ PTSD $\Rightarrow$ Depression $\Rightarrow$ LS                           | 0.01     | 0.00      | 0.00   | 0.01  | 0.00    | 3.06     | 0.002    |
| PA $\Rightarrow$ PH $\Rightarrow$ Depression $\Rightarrow$ LS                                              | 0.02     | 0.01      | 0.01   | 0.04  | 0.00    | 4.18     | <0.001   |
| PTSD $\Rightarrow$ Depression $\Rightarrow$ LS                                                             | -0.03    | 0.00      | -0.04  | -0.03 | -0.07   | -8.25    | <0.001   |

**Table S5.** Estimation of path parameters for life satisfaction in Ukrainian sample of university students ( $n = 1649$ )

| Path parameter                                                                                             | <i>B</i> | <i>SE</i> | 95% CI |       | $\beta$ | <i>z</i> | <i>p</i> |
|------------------------------------------------------------------------------------------------------------|----------|-----------|--------|-------|---------|----------|----------|
|                                                                                                            |          |           | Lower  | Upper |         |          |          |
| PH $\Rightarrow$ PTSD $\Rightarrow$ Depression $\Rightarrow$ LS                                            | -0.03    | 0.01      | -0.04  | -0.01 | 0.00    | -3.55    | < 0.001  |
| PH $\Rightarrow$ Depression $\Rightarrow$ LS                                                               | -0.13    | 0.02      | -0.17  | -0.09 | -0.02   | -5.95    | < 0.001  |
| Anxiety $\Rightarrow$ PH $\Rightarrow$ LS                                                                  | -0.03    | 0.01      | -0.04  | -0.02 | -0.03   | -6.39    | < 0.001  |
| Anxiety $\Rightarrow$ PH $\Rightarrow$ PTSD $\Rightarrow$ Depression $\Rightarrow$ LS                      | 0.00     | 0.00      | 0.00   | 0.00  | 0.00    | -3.25    | 0.001    |
| Anxiety $\Rightarrow$ PH $\Rightarrow$ Depression $\Rightarrow$ LS                                         | 0.00     | 0.00      | -0.01  | 0.00  | 0.00    | -4.89    | < 0.001  |
| Anxiety $\Rightarrow$ PTSD $\Rightarrow$ Depression $\Rightarrow$ LS                                       | -0.05    | 0.01      | -0.06  | -0.04 | -0.04   | -7.74    | < 0.001  |
| Anxiety $\Rightarrow$ Depression $\Rightarrow$ LS                                                          | -0.15    | 0.02      | -0.18  | -0.11 | -0.13   | -8.60    | < 0.001  |
| RelStat1 $\Rightarrow$ Depression $\Rightarrow$ LS                                                         | -0.21    | 0.04      | -0.29  | -0.15 | -0.02   | -5.98    | < 0.001  |
| Religiosity $\Rightarrow$ Depression $\Rightarrow$ LS                                                      | 0.14     | 0.02      | 0.10   | 0.19  | 0.02    | 6.29     | < 0.001  |
| Stress $\Rightarrow$ PH $\Rightarrow$ LS                                                                   | -0.02    | 0.00      | -0.03  | -0.02 | -0.03   | -6.05    | < 0.001  |
| Stress $\Rightarrow$ PH $\Rightarrow$ PTSD $\Rightarrow$ Depression $\Rightarrow$ LS                       | 0.00     | 0.00      | 0.00   | 0.00  | 0.00    | -3.31    | < 0.001  |
| Stress $\Rightarrow$ PH $\Rightarrow$ Depression $\Rightarrow$ LS                                          | 0.00     | 0.00      | 0.00   | 0.00  | 0.00    | -4.98    | < 0.001  |
| Stress $\Rightarrow$ PTSD $\Rightarrow$ Depression $\Rightarrow$ LS                                        | -0.01    | 0.00      | -0.02  | -0.01 | -0.02   | -7.32    | < 0.001  |
| Stress $\Rightarrow$ Anxiety $\Rightarrow$ LS                                                              | 0.12     | 0.02      | 0.09   | 0.15  | 0.15    | 7.69     | < 0.001  |
| Stress $\Rightarrow$ Anxiety $\Rightarrow$ PH $\Rightarrow$ LS                                             | -0.02    | 0.00      | -0.02  | -0.01 | -0.02   | -6.42    | < 0.001  |
| Stress $\Rightarrow$ Anxiety $\Rightarrow$ PH $\Rightarrow$ PTSD $\Rightarrow$ Depression $\Rightarrow$ LS | 0.00     | 0.00      | 0.00   | 0.00  | 0.00    | -3.26    | 0.001    |
| Stress $\Rightarrow$ Anxiety $\Rightarrow$ PH $\Rightarrow$ Depression $\Rightarrow$ LS                    | 0.00     | 0.00      | 0.00   | 0.00  | 0.00    | -4.89    | < 0.001  |
| Stress $\Rightarrow$ Anxiety $\Rightarrow$ PTSD $\Rightarrow$ Depression $\Rightarrow$ LS                  | -0.02    | 0.00      | -0.03  | -0.02 | -0.03   | -7.69    | < 0.001  |
| Stress $\Rightarrow$ Anxiety $\Rightarrow$ Depression $\Rightarrow$ LS                                     | -0.07    | 0.01      | -0.09  | -0.06 | -0.09   | -8.49    | < 0.001  |
| Stress $\Rightarrow$ Depression $\Rightarrow$ LS                                                           | -0.02    | 0.00      | -0.03  | -0.01 | -0.02   | -5.28    | < 0.001  |
| Age $\Rightarrow$ PH $\Rightarrow$ LS                                                                      | -0.02    | 0.00      | -0.03  | -0.01 | -0.01   | -4.17    | < 0.001  |
| Age $\Rightarrow$ PH $\Rightarrow$ PTSD $\Rightarrow$ Depression $\Rightarrow$ LS                          | 0.00     | 0.00      | 0.00   | 0.00  | 0.00    | -2.75    | 0.006    |
| Age $\Rightarrow$ PH $\Rightarrow$ Depression $\Rightarrow$ LS                                             | 0.00     | 0.00      | 0.00   | 0.00  | 0.00    | -3.69    | < 0.001  |
| Age $\Rightarrow$ Depression $\Rightarrow$ LS                                                              | 0.01     | 0.00      | 0.01   | 0.02  | 0.01    | 2.97     | 0.001    |
| PA $\Rightarrow$ PH $\Rightarrow$ LS                                                                       | 0.17     | 0.04      | 0.11   | 0.26  | 0.01    | 4.64     | < 0.001  |
| PA $\Rightarrow$ PH $\Rightarrow$ PTSD $\Rightarrow$ Depression $\Rightarrow$ LS                           | 0.01     | 0.00      | 0.00   | 0.01  | 0.00    | 3.06     | 0.001    |
| PA $\Rightarrow$ PH $\Rightarrow$ Depression $\Rightarrow$ LS                                              | 0.02     | 0.01      | 0.01   | 0.04  | 0.00    | 4.18     | < 0.001  |
| PTSD $\Rightarrow$ Depression $\Rightarrow$ LS                                                             | -0.03    | 0.00      | -0.04  | -0.03 | -0.07   | -8.25    | < 0.001  |
